# Supplementary material
Source: PubMed Central journal article supplement (PMC7549037)
Supplement: supp_RA120.013031_158815_2_supp_577321_qtnd0w.pdf [file supp_RA120.013031_158815_2_supp_577321_qtnd0w.pdf]

**Supplemental Figure 1.** Structures of all anthrones assessed for in vitro HIV latency reversal.

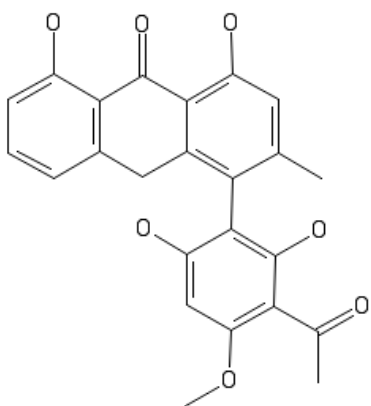

**Anthralin  
(Dithranol)**

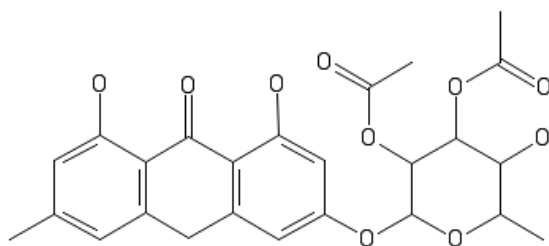

**Prinoidin**

**Knipholone anthrone**

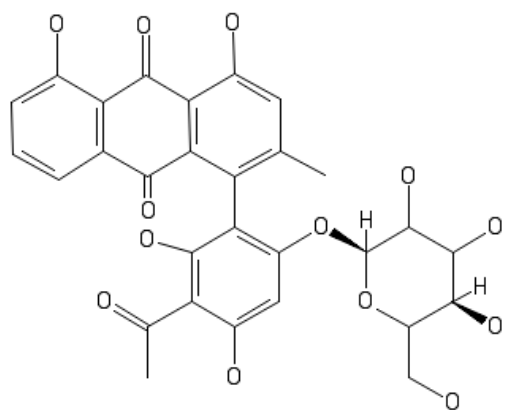

**1-[3-acetyl-2,4-dihydroxy-6-(β-D-glucopyranosyloxy)phenyl]-4,5-dihydroxy-2-methyl-9,10-anthracenedione**

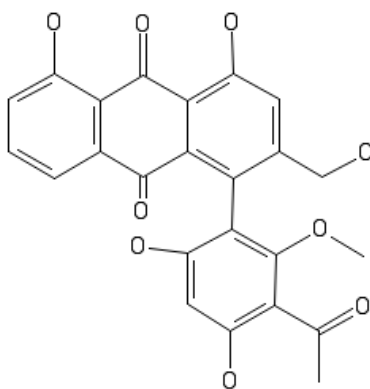

**Gaboroquinone A**

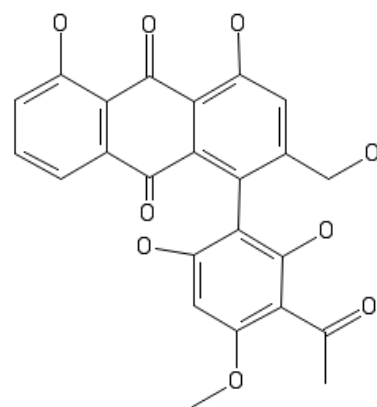

**Gaboroquinone B**

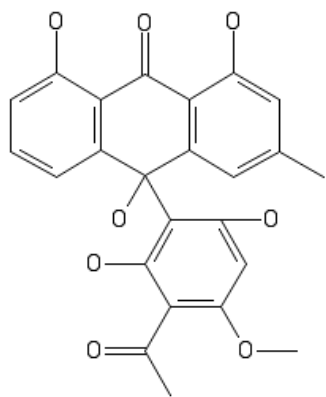

**Foliosone**

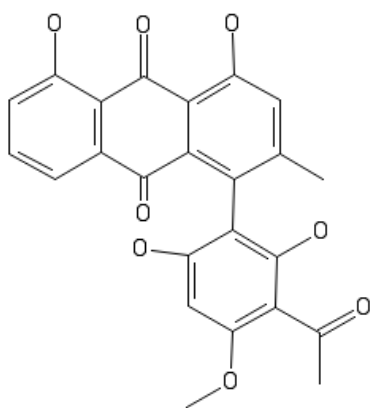

**Knipholone**

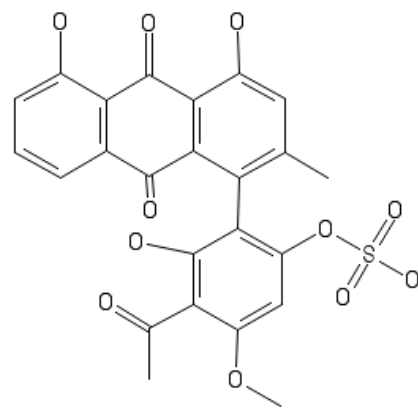

**1-[3-acetyl-2-hydroxy-4-methoxy-6-(sulfooxy)phenyl]-4,5-dihydroxy-2-methyl-9,10-anthracenedione**

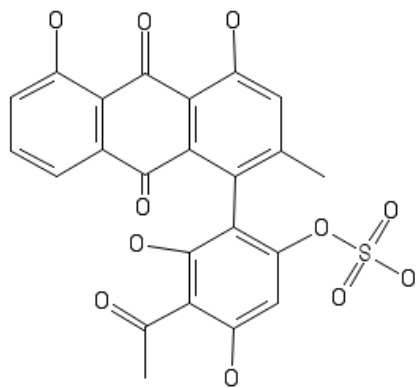

1-[3-acetyl-2,4-dihydroxy-6-(sulfooxy)phenyl]-4,5-dihydroxy-2-methyl-9,10-anthracenedione

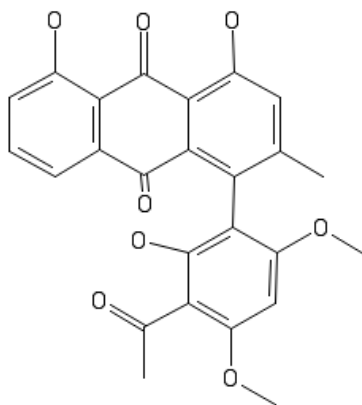

Knipholone 6'-methyl ether

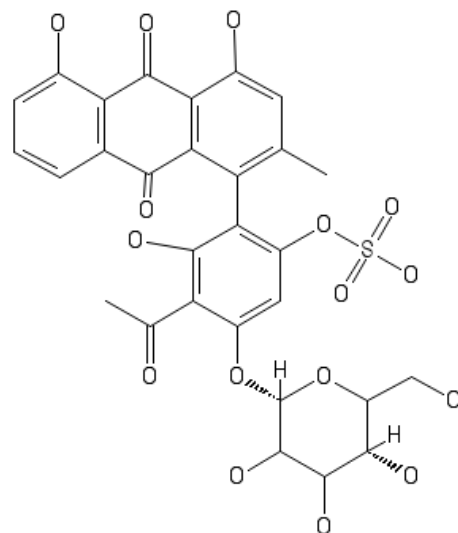

1-[3-acetyl-4-(β-D-glucopyranosyloxy)-2-hydroxy-6-(sulfooxy)phenyl]-4,5-dihydroxy-2-methyl-9,10-anthracenedione

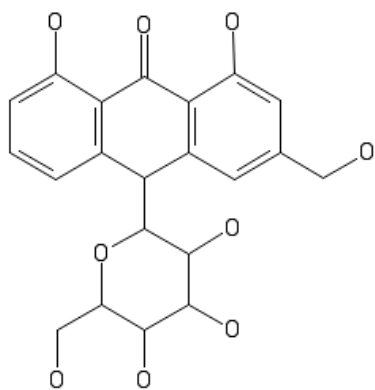

Aloin

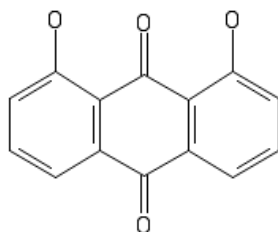

Danthron

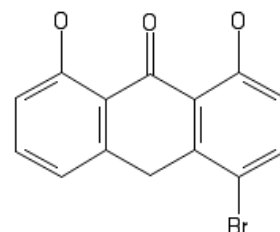

4-Bromo-1,8-dihydroxy-10H-anthracen-9-one

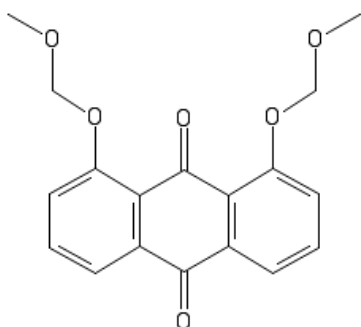

1,8-Bis(methoxy)anthracene-9,10-dione

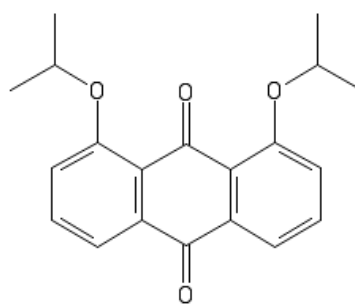

1,8-Diisopropoxyanthracene-9,10-dione
