# Supplementary material
Source: PubMed Central journal article supplement (PMC7549037)
Supplement: supp_RA120.013031_158815_2_supp_577337_qrnd0w.pdf [file supp_RA120.013031_158815_2_supp_577337_qrnd0w.pdf]

**Supplemental Table 1.** Absolute copies of HIV RNA per million cells, estimated number of cells assessed per qPCR reaction, and limit of detection of *ex vivo* studies in Figure 8B, as determined by qPCR of viral RNA and 18S housekeeping gene and normalized to copy number standards.

| Donor            | Treatment                                | Absolute copies of HIV RNA per million cells | Total # of cells analyzed | Limit of detection |
|------------------|------------------------------------------|----------------------------------------------|---------------------------|--------------------|
| 1                | 0.1% DMSO                                | < 76                                         | 13,124                    | 76                 |
|                  | 100 ng/mL PMA + 0.1 $\mu$ g/mL ionomycin | < 50                                         | 20,075                    | 50                 |
|                  | 10 $\mu$ M prostratin                    | < 54                                         | 18,687                    | 54                 |
|                  | 10 $\mu$ M KA                            | 8633                                         | 14,630                    | 68                 |
| 2                | 0.1% DMSO                                | 626                                          | 27,953                    | 36                 |
|                  | 100 ng/mL PMA + 0.1 $\mu$ g/mL ionomycin | 1008                                         | 30,172                    | 33                 |
|                  | 10 $\mu$ M prostratin                    | 1181                                         | 35,139                    | 28                 |
|                  | 10 $\mu$ M KA                            | 846                                          | 28,836                    | 35                 |
| 3                | 0.1% DMSO                                | 602                                          | 279,932                   | 4                  |
|                  | 100 ng/mL PMA + 0.1 $\mu$ g/mL ionomycin | 672                                          | 732,347                   | 1                  |
|                  | 10 $\mu$ M prostratin                    | 1514                                         | 308,599                   | 3                  |
|                  | 10 $\mu$ M KA                            | 617                                          | 400,645                   | 2                  |
| Average $\pm$ SD | 0.1% DMSO                                | 435 $\pm$ 311                                |                           |                    |
|                  | 100 ng/mL PMA + 0.1 $\mu$ g/mL ionomycin | 576 $\pm$ 486                                |                           |                    |
|                  | 10 $\mu$ M prostratin                    | 916 $\pm$ 765                                |                           |                    |
|                  | 10 $\mu$ M KA                            | 3365 $\pm$ 4563                              |                           |                    |
